# Supplementary material
Source: PubMed Central journal article supplement (PMC7128247)
Supplement: mmc1.pdf [file mmc1.pdf]

**Supplemental Information**

**Respiratory Syncytial Virus Infects Regulatory**

**B Cells in Human Neonates via Chemokine Receptor**

**CX3CR1 and Promotes Lung Disease Severity**

**Dania Zhivaki, Sébastien Lemoine, Annick Lim, Ahsen Morva, Pierre-Olivier Vidalain, Liliane Schandene, Nicoletta Casartelli, Marie-Anne Rameix-Welti, Pierre-Louis Hervé, Edith Dériaud, Benoit Beitz, Maryline Ripaux-Lefevre, Jordi Miatello, Brigitte Lemercier, Valerie Lorin, Delphyne Descamps, Jenna Fix, Jean-François Eléouët, Sabine Riffault, Olivier Schwartz, Fabrice Porcheray, Françoise Mascart, Hugo Mouquet, Xiaoming Zhang, Pierre Tissières, and Richard Lo-Man**

# Figure S1

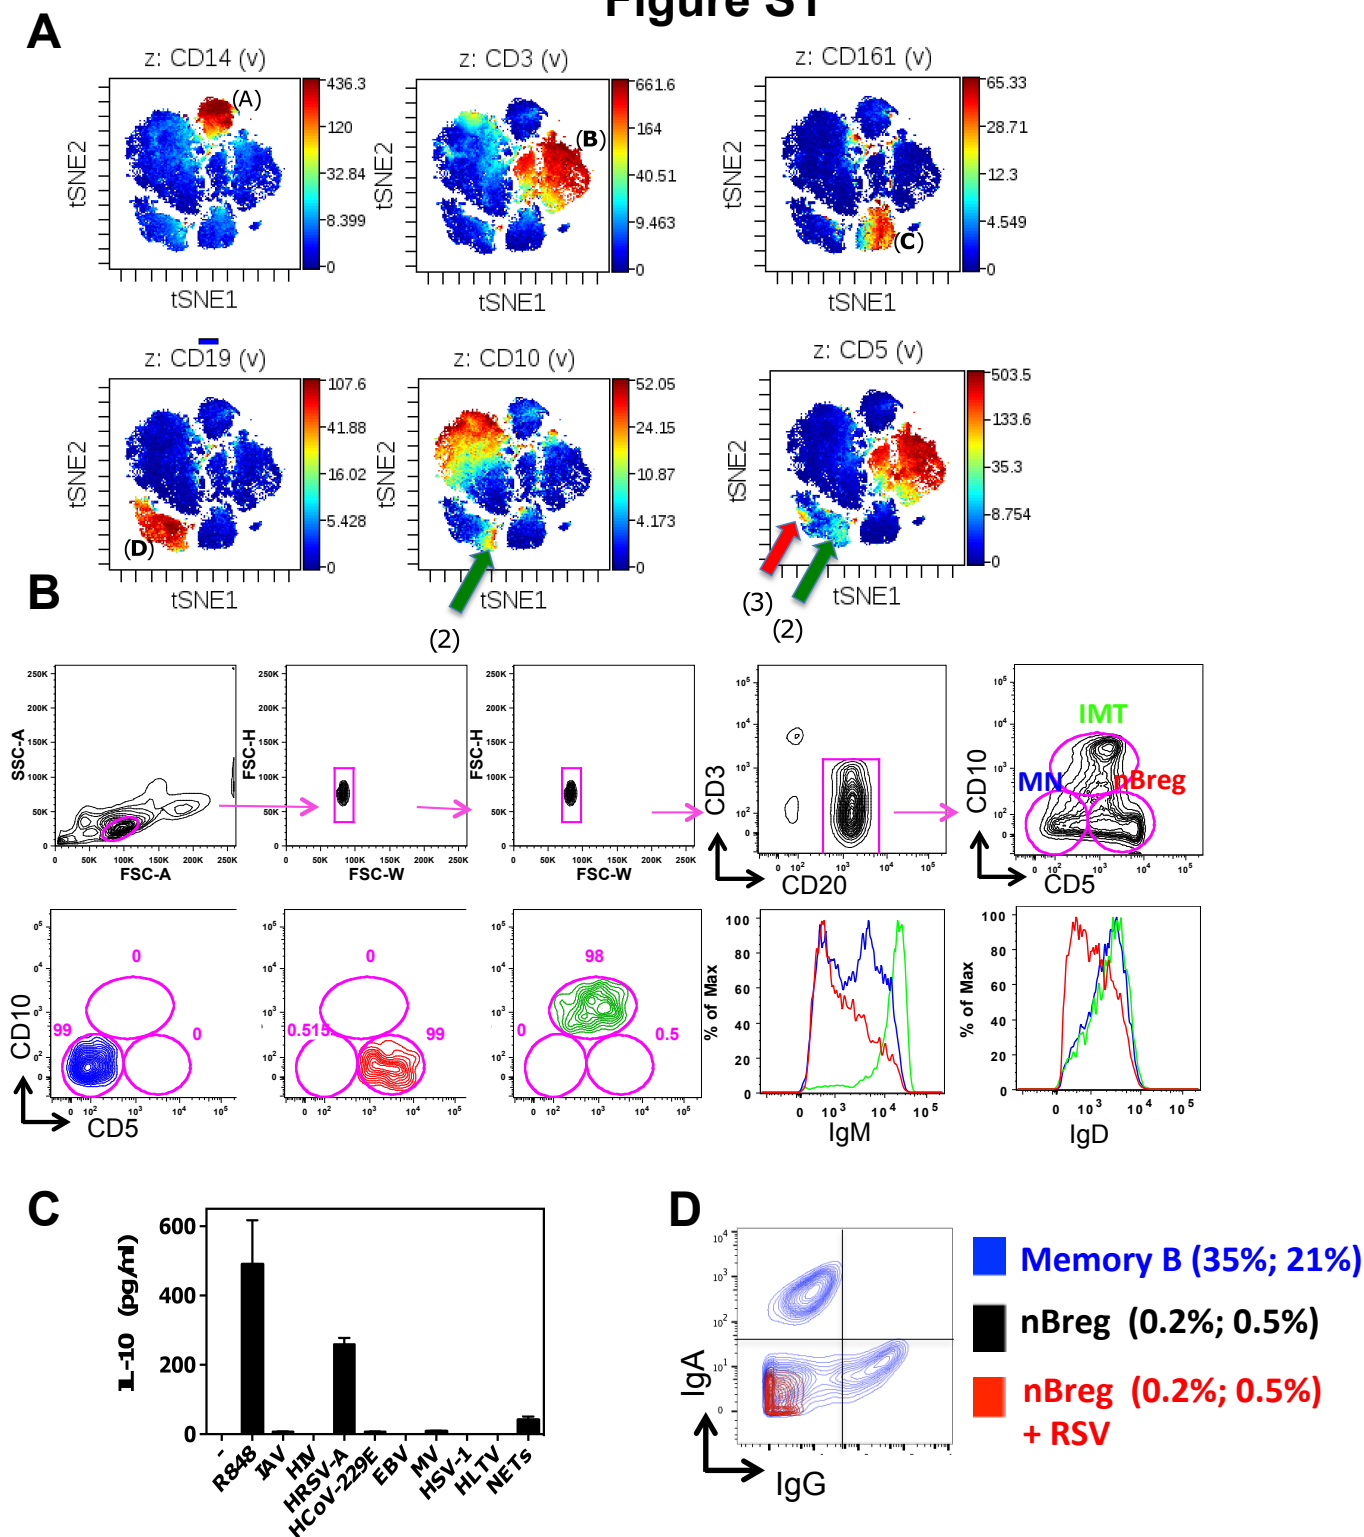

**Fig. S1 (related to Fig. 1): viSNE analysis of CBMC**

(A) Cord blood cells were analyzed as in Fig. 1A using viSNE which defines based on indicated lineage markers : (A) monocytes, (B) T cells , (C) NK cells, (D) B cells. B cell phenotypes 1, 2 and 3 can be clearly visualized independently of other blood cell types with (2) as  $CD10^{pos}CD5^{lo}$  (green arrow) and (3) as  $CD5^{hi}CD10^{neg}$  (red arrow). (B) Gating strategy for FACS sorting of neonatal B cells MN , IMT and nBreg, purity check and subsets IgM/IgD expression. (C)  $10^5$  cord blood nBregs were stimulated with the indicated stimuli. IL-10 was detected in the supernatants at 48 h (means of three donors +/-SD). (D) IgG and IgA detection on nBregs activated or not with RSV in comparison to adult Memory B cells. In parenthesis, frequencies of Ig isotype is indicated (IgA%; IgG%).

## Figure S2

**A**

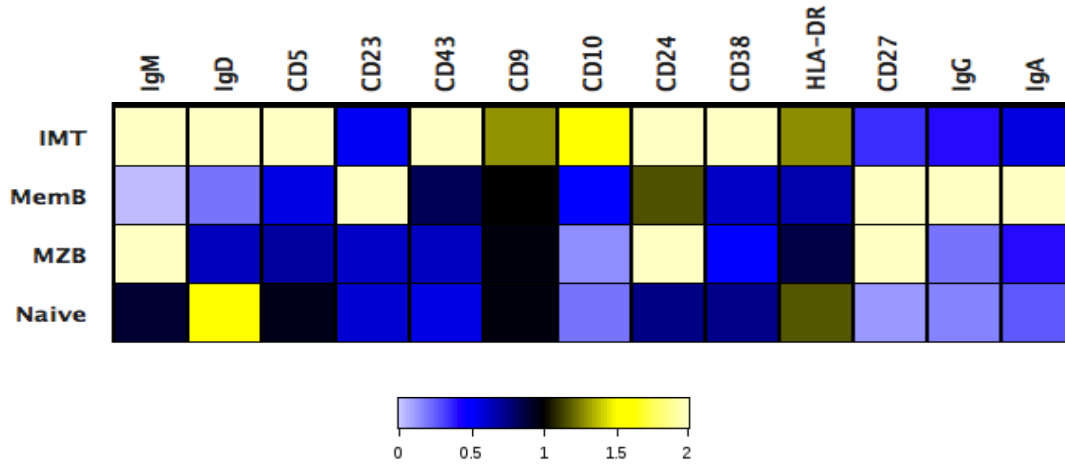

**B**

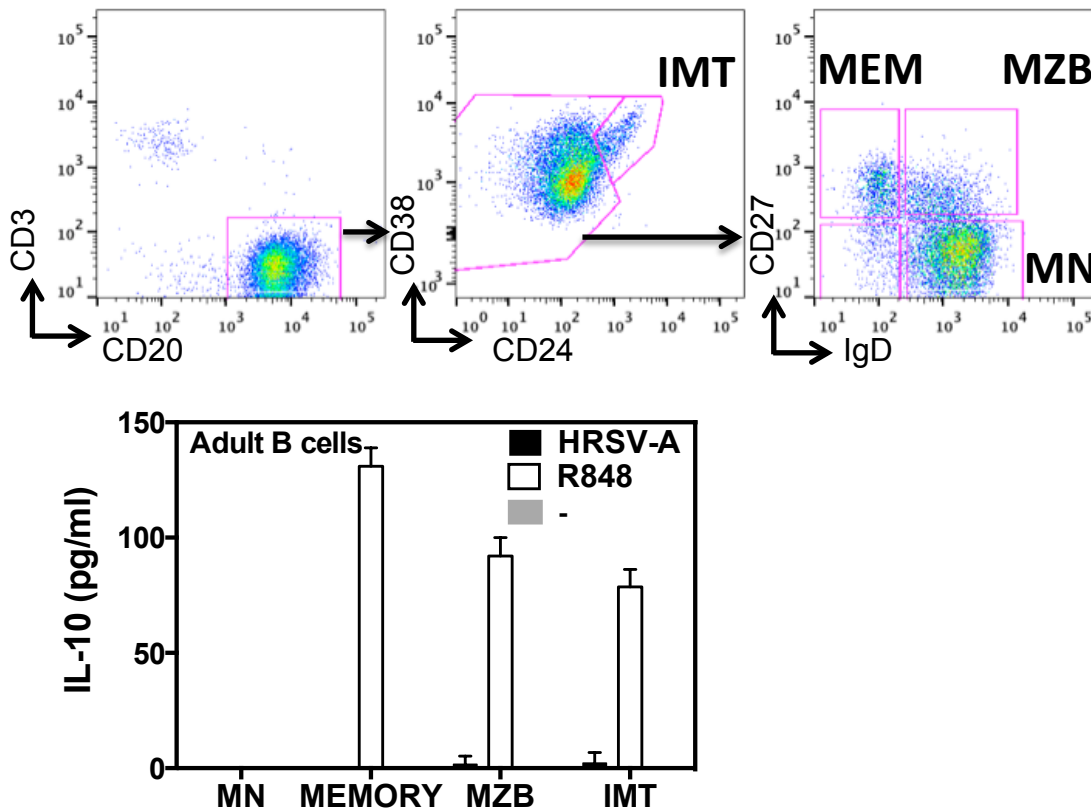

**Fig. S2 (related to Fig. 1): IL-10 response of B cells to viruses**

(A) CyTOF of adult B cell subsets for the expression of the indicated markers, data were normalized to the total population of B cells.

(B)  $10^5$  adult blood B subsets were purified by FACS with indicated gating strategy. Mature Naïve (MN), memory B cells (MEM), marginal zone B cells (MZB) were pre-gated on  $CD24^{lo}CD38^{+/-lo}$  mature B cells, and (IMT) Immature transitional correspond to  $CD24^{hi}CD38^{+}$  B cells. Sorted B cells were then stimulated or not with HRSV-A or R848 and IL-10 was detected at 48h by ELISA. Results are expressed as the means of triplicates  $\pm$  SD and are representative of two experiments.

## Figure S3

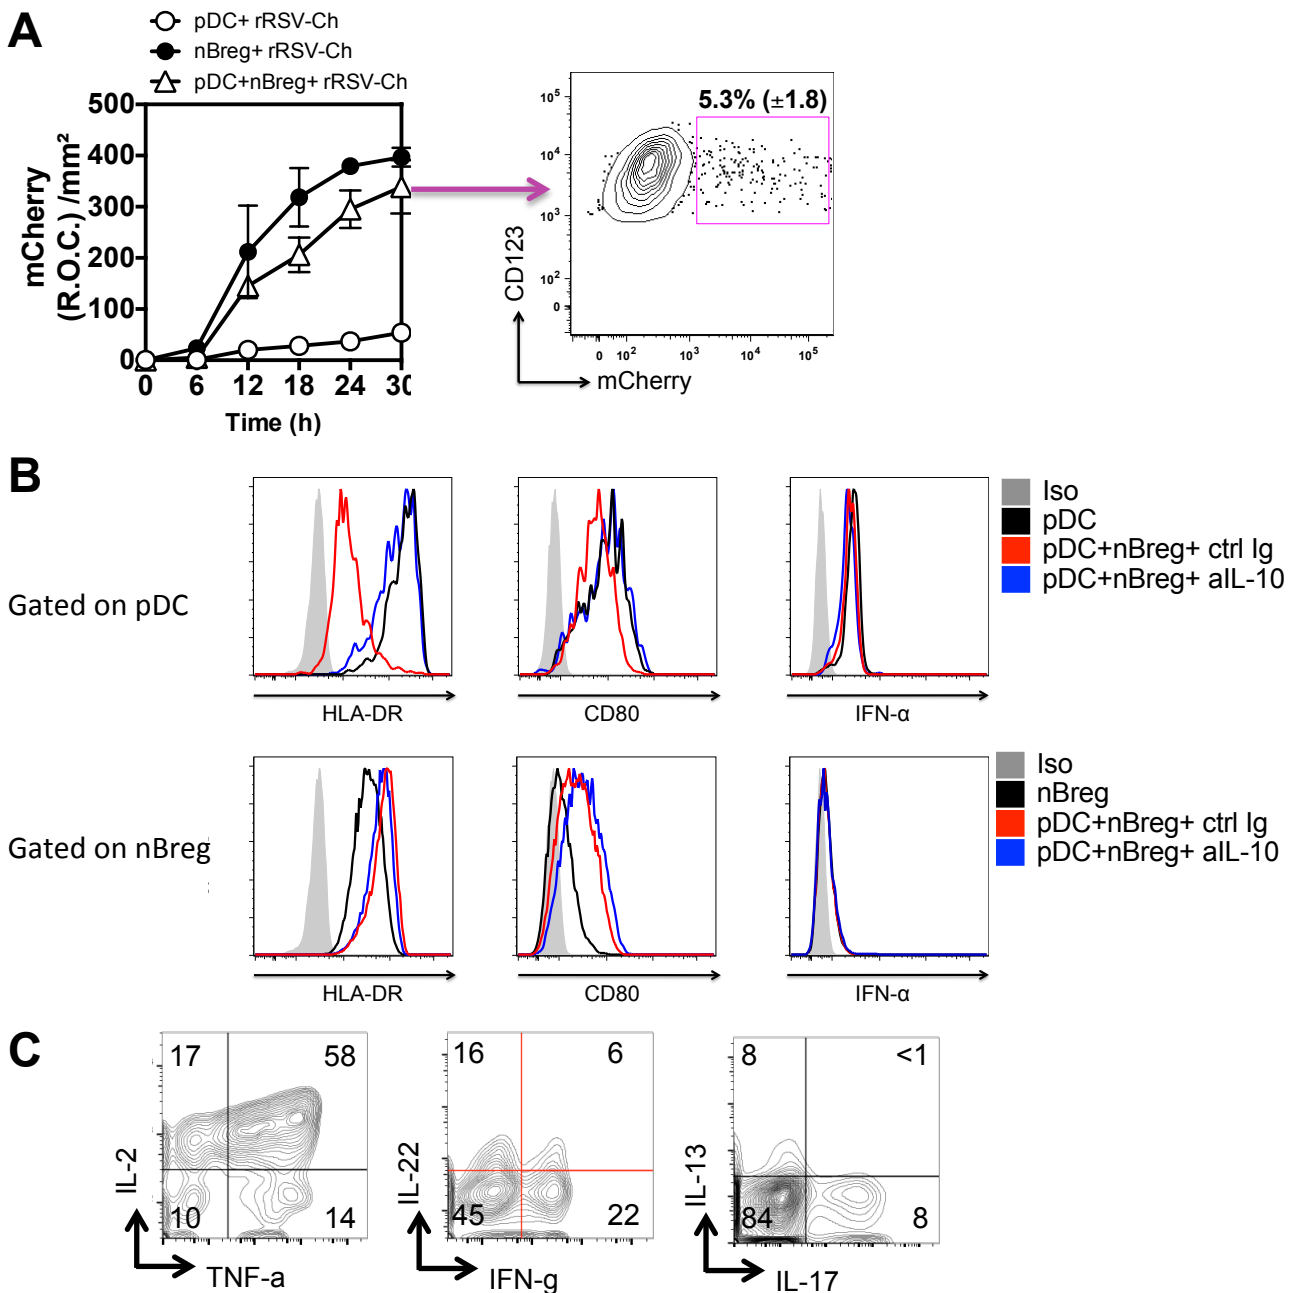

### Fig. S3 (related to Fig. 2) :

(A-B) pDC and nBreg cells were sorted from cord blood and cultured with rRSV-Ch (MOI=2.5) alone or in co-culture for 30h-48h in the presence of anti-IL10 (a-IL10) or an isotype control Ig. (A) Left panel represents pDC infection as compared to nBreg cells cultured alone measured by live microscopy. Right panel FACS plot shows the frequency of RSV infected pDC when cultured alone. Results are means of triplicates and are representative of three experiments. (B) Histograms show the expression of HLA-DR, CD80 or intracellular IFN- $\alpha$  after 48h of stimulation with HRSV-A. Iso corresponds to isotype control staining, and ctrl Ig to anti-IL10 isotype control. (C) CD4 naive T cells were culture in TH17 conditions, and serve as positive control of Fig. 2 for intracellular staining of cytokines indicated on the X and Y axes.



## Figure S4

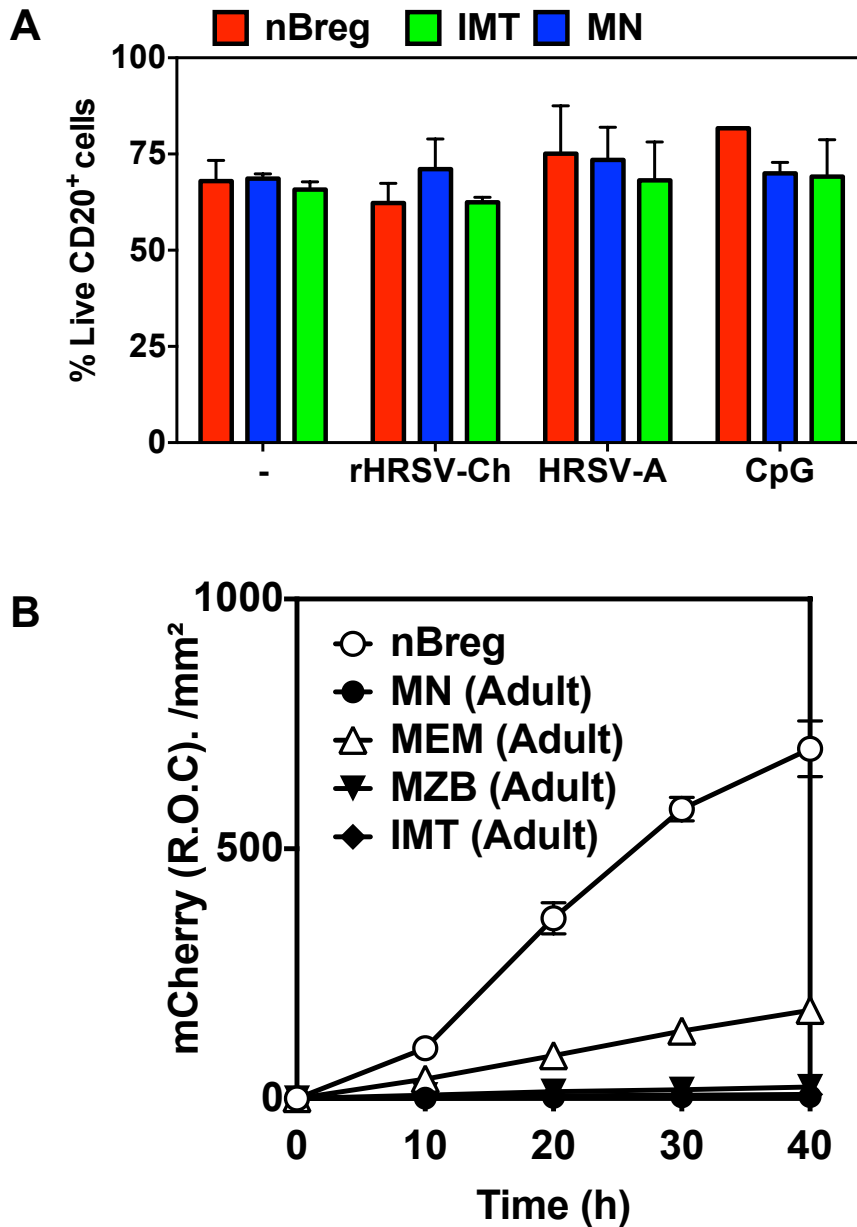

**Fig. S4 (relate to Fig. 3)**

(A)  $10^5$  B cell subsets were FACS sorted as nBreg, MN or IMT and stimulated by rHRSV-Ch, HRSV-A or CpG for 48 h. Live/dead cells were analyzed by FACS following DAPI staining. Live cells were negative for DAPI, and results are mean  $\pm$ SD of 3 experiments. (B)  $10^5$  nBregs and adult B cells were sorted as indicated in FigS2B and exposed to rHRSV-Ch (MOI=2.5). Viral infection was assessed mCherry expression using fluorescent live microscopy.

# Figure S5

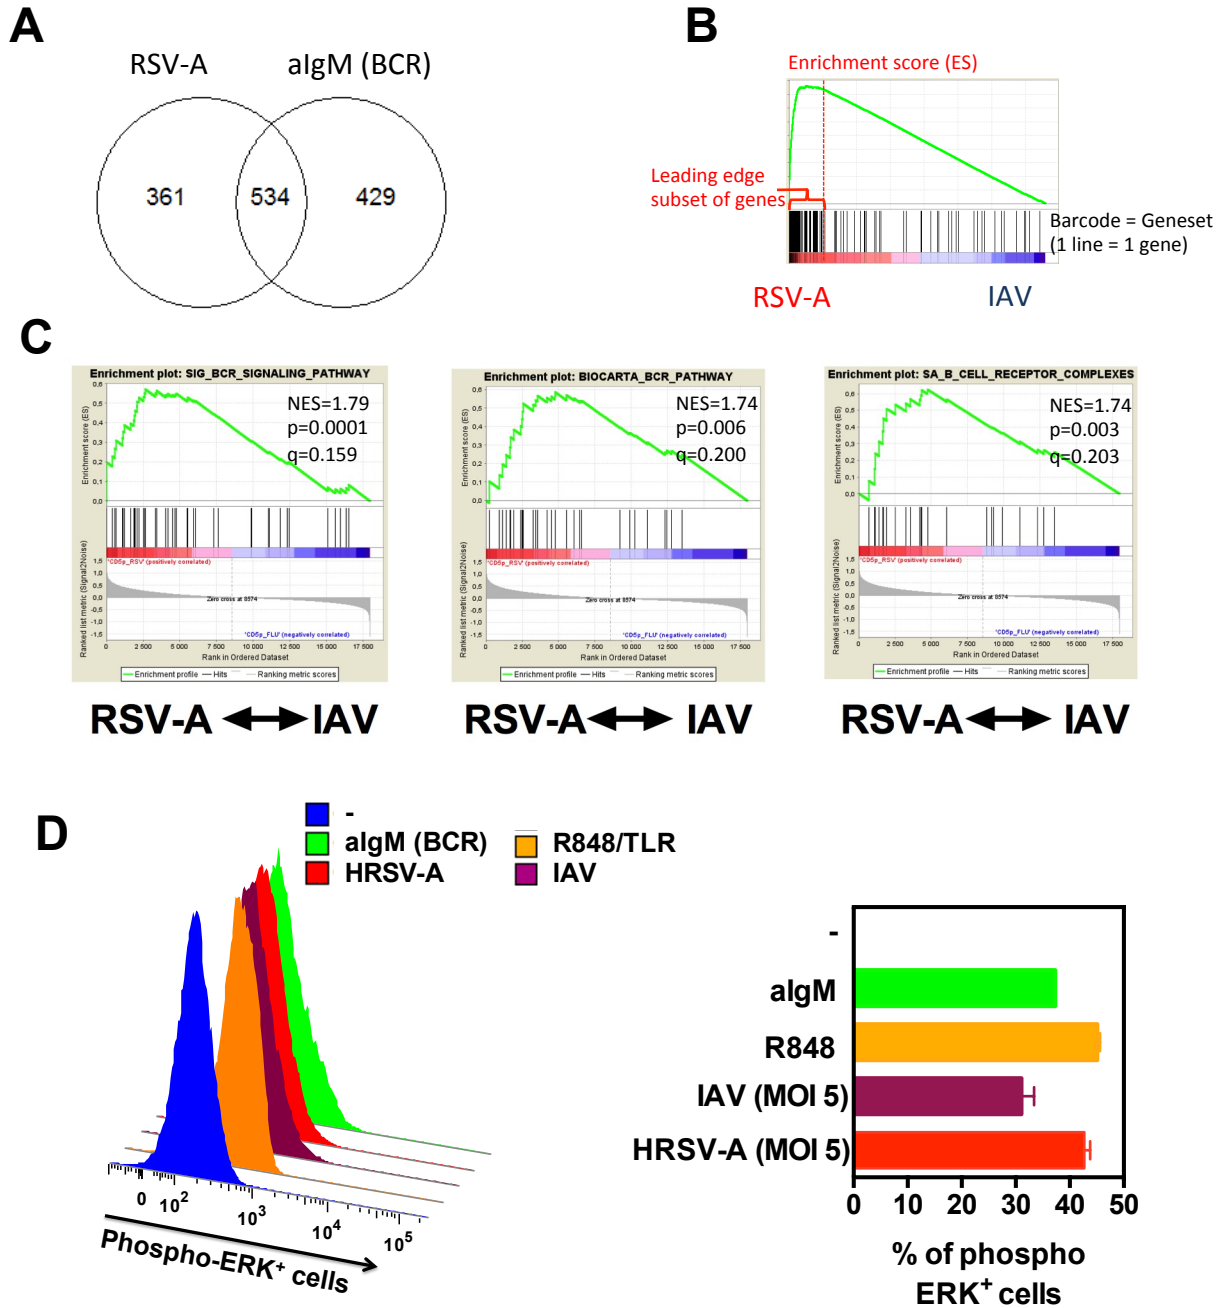

**Fig. S5 (related to Fig. 4): Pathway analysis of RSV stimulated nBregs.** (A-C) Cord blood nBregs were FACS-sorted as CD19+CD5+CD10- B cells, and they were either left unstimulated (-) or stimulated for 6 h with HRSV-A, IAV or anti-IgM. Gene expression profiles were compared by microarray analysis for 3 independent donors. (A) Venn diagram for the number of common and specific genes activated in nBregs for algM (BCR) and RSV. (B-C) GSEA analysis. (B) Description of GSEA analysis plot. (C) GSEA comparison of IAV and RSV activated nBregs for BCR receptor, signaling and molecular pathways. (D) nBregs were activated as indicated for 30 min. and ERK phosphorylation was assessed by FACS. FACS plots and mean of triplicates +/-SD are shown.

# Figure S6

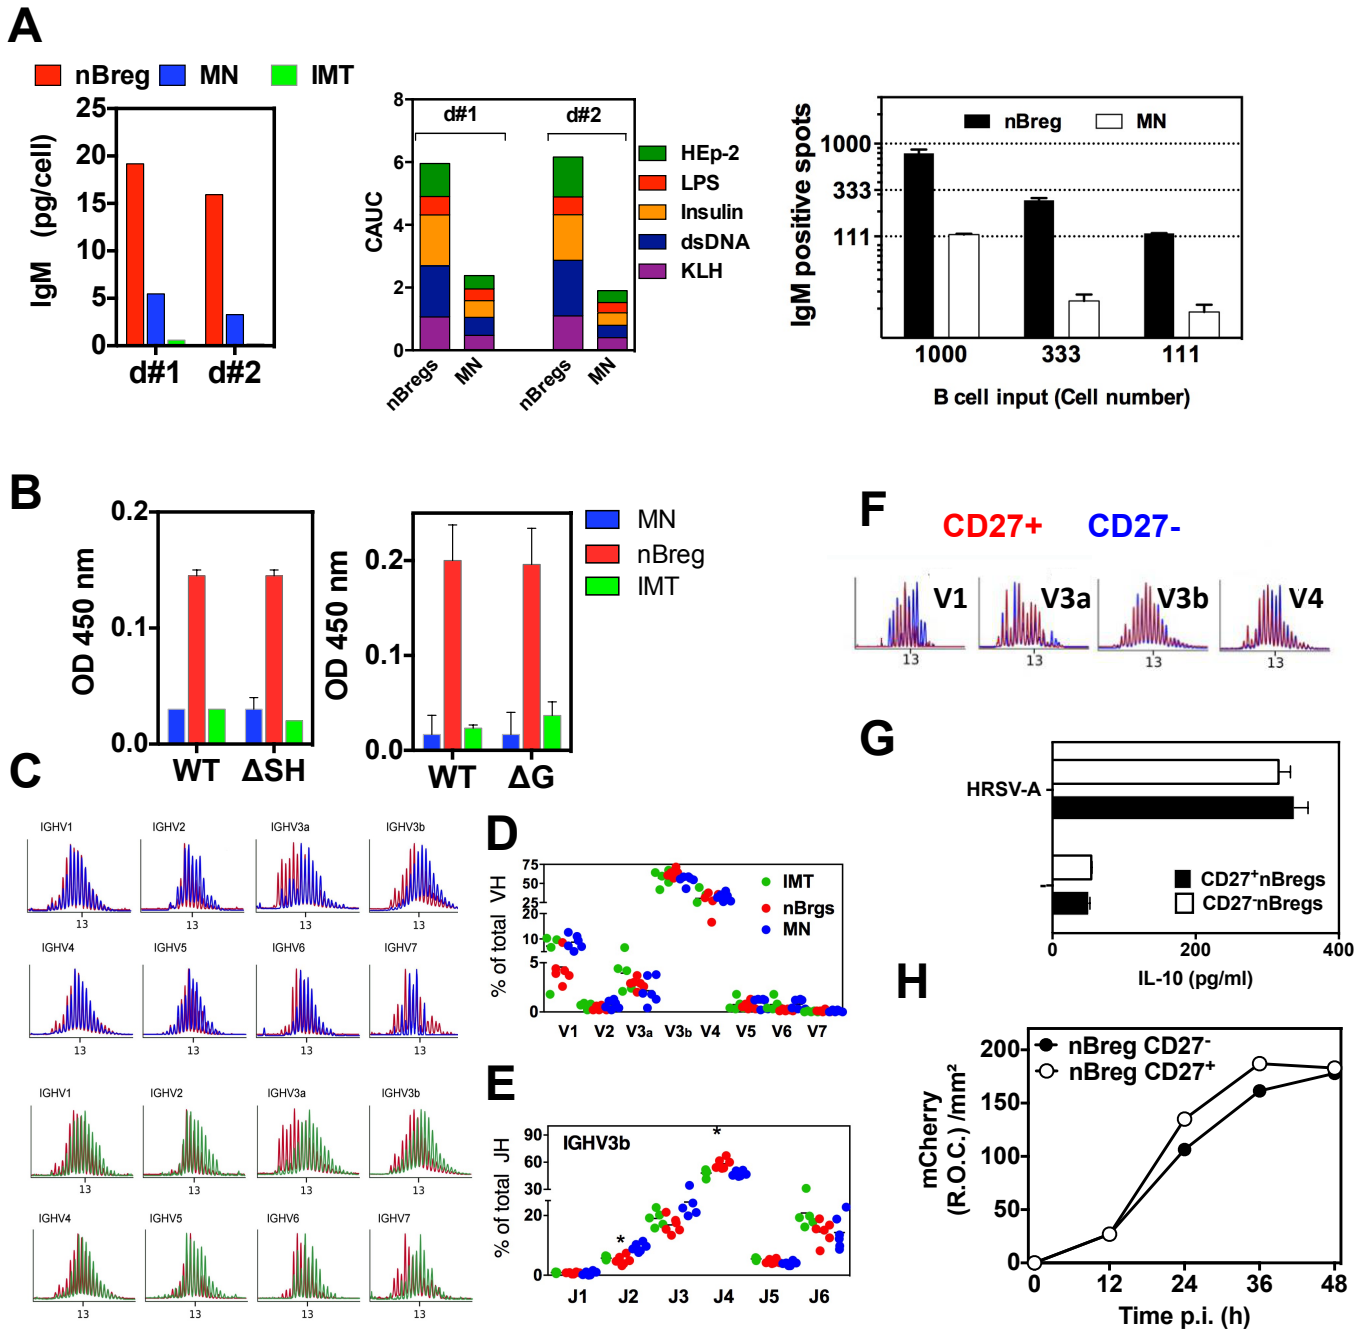

**Fig. S6 (related to Fig. 5): B cell reactivity and repertoire analysis**

(A) Indicated B cell subset ( $3 \times 10^6$ /ml) was stimulated for 6 days with CpG, and concentration of IgM was determined. IgM produced by nBregs and MN were tested at 4-0.4 and 0.04  $\mu$ g/ml for polyreactivity against the indicated Ag by ELISA and results are plotted as CAUC. Alternatively, B subsets, was analyzed using an enzymatic ELISPOT assay to evaluate the frequency IgM secreting cells after 48 h. (B) IgM (100 ng/ml) produced by nBregs, IMT and MN neonatal B cell were tested by ELISA for recognition of WT HRSV-A vs. (B)  $\Delta$ SH and (C)  $\Delta$ G mutants. (C) CDR3 length profiles (in AA) of one neonatal sample nBreg subset (red) for the various IGHV are compared by overlay with MN (blue) and IMT (green) B cell subsets. For the three neonatal B cell subsets, (D) the IgM V usage and (E) the J usage repertoire was analyzed for IgM V3b (IGHV3b) (\*P<0.05). Each dot represents one donor (n=5). (F-H) nBregs were sorted as CD27-positive and negative cell fractions and subjected to repertoire analysis as in Fig. 5 and to RSV infection and IL-10 response. CDR3 length spectra are shown for major IGHV gene family (V1, V3a, V3b and V4). (G) nBregs subsets were exposed to HRSV-A and IL-10 was detected by ELISA at 48 h. (H) nBregs subsets were exposed to rHRSV-Ch and infection was monitored by following mCherry expression by fluorescent live microscopy for 48h.

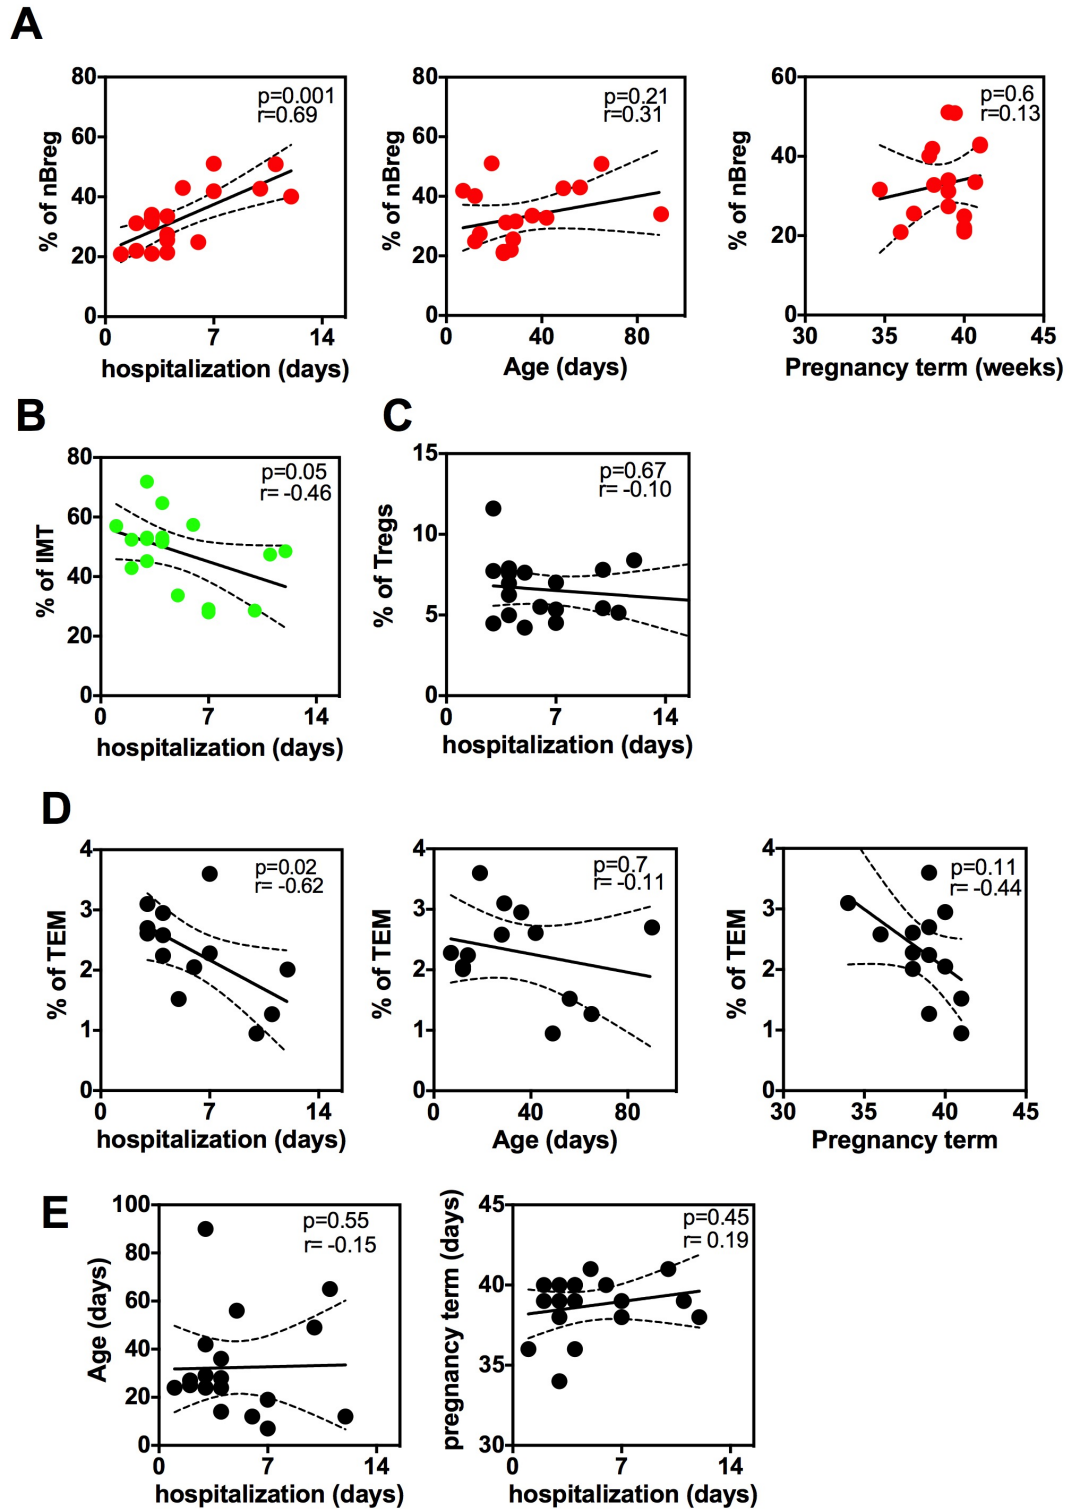

**Figure S7 (related to Fig. 7) : RSV-positive patient cohort analysis.** Correlation analysis of blood cell parameters of patients suffering of acute bronchiolitis with duration of ICU hospitalization, age of patients and pregnancy term. Immunological parameters correspond to those presented in Figure 7.

## Supplementary Experimental procedures

### HRSV mutants

To generate the rHRSV- $\Delta$ G-Cherry virus, the first ATG of the G gene was substituted by ACA by site-directed mutagenesis using the QuickChange II site-directed mutagenesis kit (Stratagene). Mutagenesis was performed using the pJET2.1 vector in which the HRSV G gene was cloned at XhoI-StuI sites, with the following primers: forward primer: CGTTGGGGCAAATGCAAACA[CA]TCCAAAAA CAAGGACCAACGC; reverse primer: GCGTTGGTCCTTGT[TTT]TGGAT[GT]GT[TTT]GCATTTGCC CCAACG (sequence changes were boxed). The modified sequence was then sub-cloned in the pACNR-rHRSV-Cherry vector (Genbank accession N° KF713492.1) to engineer the pACNR-rHRSV- $\Delta$ G-Cherry vector. Sequence analysis was carried out to control the integrity of this vector. The recombinant rHRSV- $\Delta$ G-Cherry virus was recovered by co-transfecting the pACNR-rHRSV- $\Delta$ G-Cherry vector together with plasmids expressing the RSV N, P, M2-1 and L proteins in BSRT7/5 cells (Buchholz et al., 1999) as previously described (Rameix-Welti, 2014). Rescued viruses were passaged and amplified on Vero cells grown at 37°C with 5% CO<sub>2</sub> in EMEM (Gibco) supplemented with 2% foetal calf serum (FCS). To control that rHRSV- $\Delta$ G-Cherry no longer express G, immunofluorescence was carried out after virus titration on Vero cells (described below). Briefly, 6 days postinfection cells were wash with PBS 1X, fixed with PBS- PFA 4% and labelled with either a polyclonal anti-N serum (Castagne et al., 2004) or anti-G monoclonal antibodies (AbD Serotec). Fluorescent plaques were observed using an inverted fluorescence microscope. For rHRSV- $\Delta$ SH, SH gene together with corresponding Gene Start and Gene End signals was deleted from the full-length cDNA clone of HRSV subgroup A previously described (Rameix-Welti et al., 2014) using standard cloning procedures. Resulting sequence is available in the Genbank nucleotide database with accession code KU707921. rHRSV- $\Delta$ SH was rescued and amplified as previously described. Viral genome sequence was verified at passage 3. Viruses were titrated on Vero cells at 37°C using a plaque assay procedure derived from the one previously described (Rameix-Welti et al., 2014).

### RSV detection in nasal washes.

For RSV expression, B cell subsets were directly sorted from the nasal washes in a Lysis Solution (Lysis Enhancer and Resuspension Buffer at a ratio 1:10) (CellsDirect™ One-Step qRT-PCR Kit, Invitrogen). Sequence-specific pre-amplification was performed using TaqMan PreAmp Master Mix (Invitrogen). Unincorporated primers were inactivated by Exonuclease I treatment (New England Biolabs). RSV nucleoprotein gene N analysed by qPCR with 2x Sso Fast EvaGreen Supermix With Low ROX (Bio-Rad Laboratories) using primers in 48:48 Dynamic Arrays on a Biomark System (Fluidigm). Quantitative data for the viral N was normalized to house keeping genes mRNA content ( $\beta$ -actin and GAPDH). RSV N forward primer AGATCAACTTCTGTCATCCAGCAA and reverse primer TTCTGCACATCATAATTAGGAG TATCAAT were used.

## **B cell repertoire analysis.**

We characterized the IgM repertoire at the molecular level in various B-cell subsets from cord blood. IGHV gene usage and CDR3 analysis were performed using the Immunoscope method coupled with real-time PCR to provide quantitative information on the IGHV and IGHJ gene usage. Briefly, PCR reactions were performed by combining a primer and a specific fluorophore-labeled probe for the constant region CH $\mu$  with one of eight primers covering the different IGHV1-7 genes. V3 was divided in two subgroups: V3a (V3-15,49,72,73) and V3b (V3-d,07,09,11,13,20,21,23,30,30.3,33,43,48,53,64,66,74). Reactions were performed using Taqman 7300. PCR products were subjected to run-off reactions with a nested fluorescent primer specific for the constant region gene. The fluorescent products were separated and analyzed on an ABI-PRISM 3730 DNA analyzer to determine CDR3 lengths. The IGHV3a/C amplification products were cloned, sequenced, and analyzed according to the procedure described previously ([Lim et al., 2008](#)). A more detailed analysis of V-C $\mu$  H-chain transcripts was performed to examine the usage of IGHD families and the IGHJ gene as well as the

of the IGHV-D and IGHJ-IGHD junction regions. IMGT/junction analysis was used to accurately identify the different regions of the junctions: 3'V-region, D-region(s), and 5'J-region. IGVH CDR3 length was analyzed in nBregs, and NM B cells. Each profile represents the CDR3 length distribution for a given IGVH family. One-way ANOVA was used for group comparisons; P values <0.05 were considered statistically significant. List of primers is detailed below.

### **Polyreactivity ELISA**

IgM (3-4 $\mu$ g/ml) from nBregs or MN were tested for polyreactivity using high-binding 96-well ELISA plates (Costar) coated with 10  $\mu$ g/ml of LPS from *E. coli* (Sigma, L2637), Keyhole Limpet Hemocyanin (KLH) (Sigma, H8283), ssDNA from dsDNA (heated at 95°C for 30 min), 5  $\mu$ g/ml Human insulin (Sigma, I9278), HEP-2 whole cell lysates (Prigent et al., 2016) and purified HIV-1 (YU-2) gp140 trimers gp140 (Mouquet et al, 2011). (2.5 $\mu$ g/ml). ELISA done as previously described. HRSV-F protein (4 $\mu$ g/ml) was described (McLellan et al., 2011 ; McLellan et al., 2013)

Buchholz, et al. *J Virol* 73, 251-259.

Castagne, N., et al. *The Journal of general virology* 85, 1643-1653.

Lim, A. et al. *Int Immunol* 20, 105-116.

McLellan, et al. *Science* 340 (6136): 1113–17. doi:10.1126/science.1234914.

McLellan et al. *Journal of Virology* 85 (15): 7788–96. doi:10.1128/JVI.00555-11.

Rameix-Welti, M.A. et al. *Nature communications* 5, 5104.

Prigent, J. et al., *European journal of immunology* 46, 2340-2351.

Mouquet, H. et al. *PloS one* 6, e24078.

**Supplementary Experimental procedures  
are related to reagents and info of the  
experimental procedure**

**List of V, J and Cmu specific primers for repertoire analysis.**

|                      | <b>Primer Sequence</b>                           | <b>Specificity</b>                          | <b>Location</b> |
|----------------------|--------------------------------------------------|---------------------------------------------|-----------------|
| <b>IGHV subgroup</b> |                                                  |                                             |                 |
| V1                   | AGTGAAGGTCTCCTGCAAGGC                            | V1-02,08,18,58,69,e                         | FR1             |
|                      | AGTGAAGGTTTCTCCTGCAAGGC                          | V1-03,45,46                                 | FR1             |
|                      | AGTGAARRTCTCCTGCAAGGT                            | V1-f,24                                     | FR1             |
| V2                   | AACCCACASAGACCCTCAC                              | V2-05,70,26                                 | FR1             |
| V3a                  | GCAGATTCACCATCTCAAGAGATG                         | V3-15,49,72                                 | FR3             |
|                      | GCAGGTTACCATCTCCAGAGATG                          | V3-73                                       | FR3             |
| V3b                  | GCCGATTCACCATCTCCAGAGA                           | V3-07,09,13,20,21,30,30.3<br>33,43,48,53,74 | FR3             |
|                      | GCAGATTCACCATCTCCAGAGA                           | V3-d,64,66                                  | FR3             |
|                      | GCCGATTCACCATCTCCAGGGA                           | V3-11                                       | FR3             |
|                      | GCAGGTTACCATCTCCAGAGA                            | V3-23                                       | FR3             |
| V4                   | CTACAACCCGTCCTCAAGAGT                            | V4-04,28,30-2,30-4,31,34,b                  | FR3             |
|                      | CTACAACCCCTCCTCAAGAGT                            | V4-59,61                                    | FR3             |
| V5                   | GTGAAAAAGCCCGGGGAG                               | V5-51,a                                     | FR1             |
| V6                   | TCCGGGGACAGTGCTCT                                | V6-01                                       | FR1             |
| V7                   | GGTGCAATCTGGGTCTGAGT <sup>*</sup> T <sup>*</sup> | V7-04.1                                     | FR1             |
| <b>IGHJ subgroup</b> |                                                  |                                             |                 |
| J1                   | CCCTGGCCCCAGTGCT <sup>*</sup> G                  | J1                                          |                 |
| J2                   | CCACGGCCCCAGAGATC <sup>*</sup> G                 | J2                                          |                 |
| J3                   | CCCTTGGCCCCAGAYATCAAAA <sup>*</sup> G            | J3a,b                                       |                 |
| J4                   | GGTTCCTTGGCCCCAGTA <sup>*</sup> G                | J4a                                         |                 |
|                      | GGTTCCTTGGCCCCAGTA <sup>*</sup> G                | J4b                                         |                 |
|                      | GGTTCCTTGGCCCCAGTA <sup>*</sup> G                | J4d                                         |                 |
| J5                   | TGGCCCCAGGRGTCGAA <sup>*</sup> C                 | J5a,b                                       |                 |
| J6                   | CCTTGGCCCCAGACGTCCA <sup>*</sup> T               | J6a                                         |                 |
|                      | CCTTGGCCCCAGACGTCCA <sup>*</sup> T               | J6b                                         |                 |
|                      | CCTTTGGCCCCAGACGTCCA <sup>*</sup> T              | J6c                                         |                 |
| <b>IGH mu chain</b>  |                                                  |                                             |                 |
|                      | CAGCCAACGGCCACGC                                 | IGHM.01,02,03                               | CH1             |
|                      | 6Fam-GGAGACGAGGGGGAAAAGG                         |                                             | CH1             |
|                      | 6Fam-CCGTCCGATACGAGC-MGB                         |                                             | CH1             |



**Supplementary Experimental procedures  
are related to reagents and info of the  
experimental procedure**

**Demographic and diagnostics data of  
children**

|                                                 | <b>RSV group</b> | <b>positive</b> | <b>negative</b> |
|-------------------------------------------------|------------------|-----------------|-----------------|
| <b>Diaganostics</b>                             | RSV+             | 36              | 10              |
|                                                 | Other viruses    | 0               | 0               |
|                                                 | Bacteria         | 6               | 0               |
| <b>Sampling</b>                                 | Blood            | 29              | 10              |
|                                                 | NPA              | 13              | 0               |
| <b>Age (months)</b>                             | median           | 1.18            | 1.15            |
|                                                 | IQR              | 0.63-1.73       | 0.16-2.03       |
| <b>Gestational<br/>age at birth<br/>(weeks)</b> | median           | 39              | 38              |
|                                                 | IQR              | 38-40           | 37-39.29        |
| <b>Weight (kg)</b>                              | median           | 4.0             | 3.9             |
|                                                 | IQR              | 3.34-5.03       | 3.46-4.65       |



**Supplementary Experimental procedures  
are related to reagents and info of the  
experimental procedure**

**List of antibodies used for mass cytometry**

|        |          |               |           |
|--------|----------|---------------|-----------|
| 141 Pr | CD196    | REA190        | Miltenyi  |
| 142 Nd | CD19     | LT19          | Miltenyi  |
| 143 Nd | CD11c    | mj4-27g12     | Miltenyi  |
| 143 Nd | CD123    | AC145         | Miltenyi  |
| 143 Nd | CD56     | REA196        | Miltenyi  |
| 143 Nd | IgA      | IS11-8E10     | Miltenyi  |
| 144 Nd | CD38     | IB6           | Miltenyi  |
| 145 Nd | CD4      | RPT-T4        | Biologend |
| 146 Nd | CD161    | 191B8         | Miltenyi  |
| 146 Nd | CD20     | LT20          | Miltenyi  |
| 146 Nd | CD8      | BW135/80      | Miltenyi  |
| 147 Sm | CD11b    | M1/70.15.11.5 | Miltenyi  |
| 147 Sm | CD20     | LT20          | Miltenyi  |
| 148 Nd | CD86     | FM95          | Miltenyi  |
| 149 Sm | CD15     | VIMC6         | Miltenyi  |
| 150 Nd | CD10     | 97C5          | Miltenyi  |
| 150 Nd | CD304    | AD5-17F6      | Miltenyi  |
| 151 Eu | CD70     | REA292        | Miltenyi  |
| 151 Eu | CD5      | AC145         | Miltenyi  |
| 152 Eu | CD23     | M-L23,4       | Miltenyi  |
| 152 Eu | CD4      | VIT4          | Miltenyi  |
| 153 Eu | CD62L    | 145/15        | Miltenyi  |
| 154 Sm | CD27     | M-T271        | Miltenyi  |
| 158 Gd | CD40     | HB14          | Miltenyi  |
| 159 Tb | CD197    | REA108        | Miltenyi  |
| 159 Tb | CD9      | SN4           | Miltenyi  |
| 160 Gd | CD14     | TUK4          | Miltenyi  |
| 161 Dy | CD33     | AC104.3E3     | Miltenyi  |
| 162 Dy | CD11c    | mj4-27g12     | Miltenyi  |
| 164 Dy | CD15     | VIMC6         | Miltenyi  |
| 164 Dy | CD161    | 191B8         | Miltenyi  |
| 164 Dy | CD56     | REA196        | Miltenyi  |
| 165 Ho | CD43     | DF-T1         | Miltenyi  |
| 166 Er | CD24     | 32D12         | Miltenyi  |
| 167 Er | CD5      | UCHT2         | Miltenyi  |
| 168 Er | CD138    | 44F9          | Miltenyi  |
| 169 Tm | CD45RA   | T6D11         | Miltenyi  |
| 169 Tm | IgG      | IS11-3B2.2.3  | Miltenyi  |
| 170 Er | CD3      | UCHT1         | Biologend |
| 172 Yb | anti-IgM | PJ2-22H3      | Miltenyi  |
| 173 Yb | CD21     | HB5           | Miltenyi  |
| 173 Yb | CD40     | HB14          | Miltenyi  |
| 174 Yb | anti-IgD | IgD26         | Miltenyi  |
| 174 Yb | HLA-DR   | AC122         | Miltenyi  |
| 175 Lu | CD10     | 97C5          | Miltenyi  |
| 175 Lu | HLA-DR   | AC122         | Miltenyi  |
| 176 Yb | CD1c     | AD5-8E7       | Miltenyi  |

**Supplementary Experimental procedures  
are related to reagents and info of the  
experimental procedure**

|                    |              |                           |
|--------------------|--------------|---------------------------|
| Erk1/2 (T202/Y204) | MILAN8R      | eBioscience               |
| CXCR3              | G025H7       | Biologend                 |
| CX3CR1             | 2A9-1        | Miltenyi Biotec           |
| CCR6               | 11A9         | BD                        |
| CD10               | ebioCB-CALLA | eBioscience               |
| CD123              | 6H6          | eBioscience               |
| CD127              | ebioRDR5     | eBioscience               |
| CD14               | HCD14        | Biologend                 |
| CD19               | J3-129       | eBioscience               |
| CD20               | 2H7          | eBioscience               |
| CD25               | BC96         | Biologend                 |
| CD27               | L128         | BD                        |
| CD3                | OKT3         | eBioscience               |
| CD304              | AD5-17F6     | Miltenyi Biotec           |
| CD4                | RPA-T4       | eBioscience               |
| CD45RA             | HI100        | Biologend                 |
| CD45RO             | UCHL1        | eBioscience               |
| CD5                | L17F12       | eBioscience               |
| CD79a (Tyr182)     | D1B9         | Cell signaling technology |
| IFN-g              | 45.B3        | Biologend                 |
| IL-4               | MP4-25D2     | BD                        |
| IL-13              | JES10-5A2    | Biologend                 |
| IL-17A             | BL168        | Biologend                 |
| IL-22              | 22URTI       | eBioscience               |
| TNF-a              | MAb11        | eBioscience               |
| IL-10              | JES3-9D7     | eBioscience               |
| IFN- $\alpha$      | LT27:295     | Miltenyi Biotec           |
| CD80               | 2D10         | Biologend                 |
| HLA-DR             | L243         | Biologend                 |
